# Supplementary material
Source: PubMed Central journal article supplement (PMC10958543)
Supplement: NIHPP2023.11.06.565774v3-supplement-1.pdf [file NIHPP2023.11.06.565774v3-supplement-1.pdf]

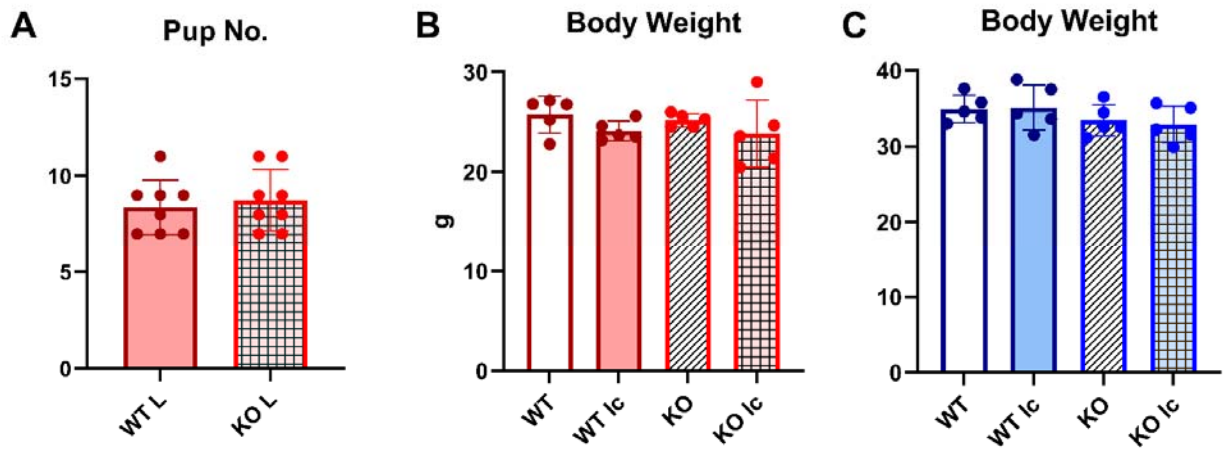

1002

1003

**Supplementary Figure 1: Pup numbers for the lactation experiment, and body weight measurements for the low calcium-diet experiment**

1004

1005

Panel **A** shows total pup numbers in WT and KO female mice that underwent pregnancy and 2 weeks of lactation. There are no significant differences in the pup numbers between genotypes. Students t-test was performed for statistical analysis. n= 8/group.

1006

1007

1008

panels **B** and **C** show total body weight of WT and KO female (**B**) and male (**C**) mice. No statistically significant difference was found among the groups, regardless of genotype or diet. 2-way ANOVA with Tukey's post hoc test was done. n= 4-5/group. As depicted here, red is female, and blue is male.

1009

1010

1011

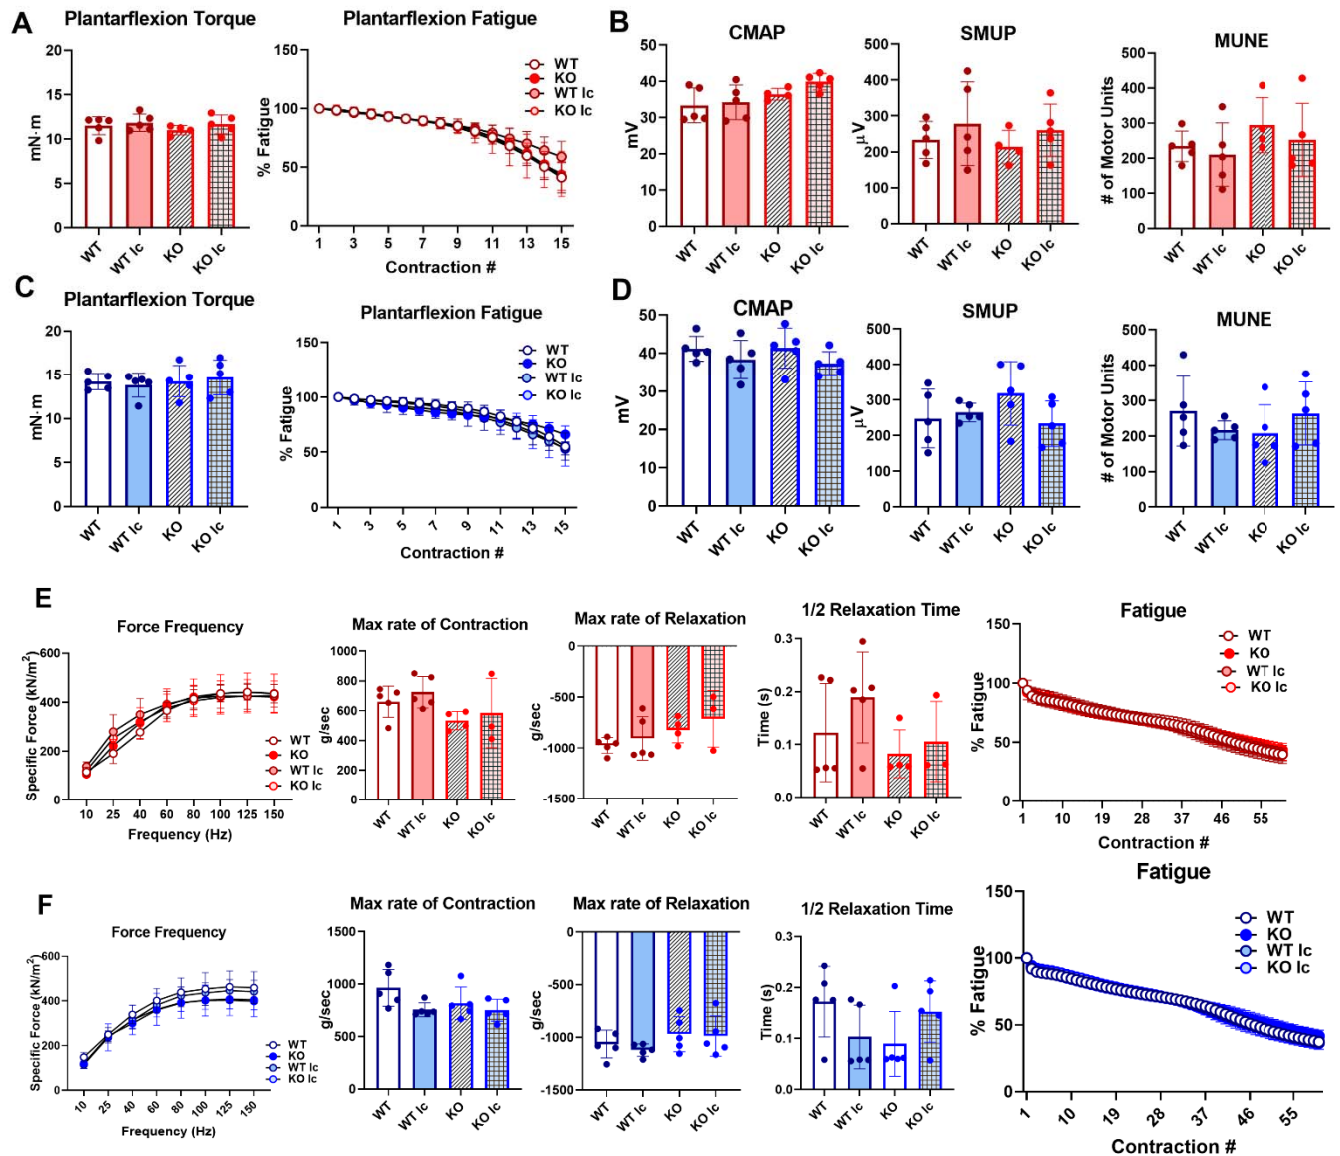

**Supplementary Figure 2: Neither genotype nor dietary calcium alters muscle functions *in vivo* or *ex vivo***

Panels **A** and **C** show *in vivo* muscle plantarflexion force (reported as plantarflexion torque and plantarflexion fatigue) in WT and KO female (**A**) and male (**C**) mice on a control or a low calcium diet, panels **B** and **D** show muscle electrophysiology parameters of CMAP, SMUP, and MUNE in WT and KO female (**B**) and male (**D**) mice, and panels **E** and **F** show *ex vivo* EDL functional measurement (reported as specific force frequency, maximum rate of contraction, maximum rate of relaxation, half-relaxation time, and % fatigue) in WT and KO female (**E**) and male (**F**) mice.

2-way ANOVA was performed. n= 4-5/group. As depicted here, red is female, and blue is male.

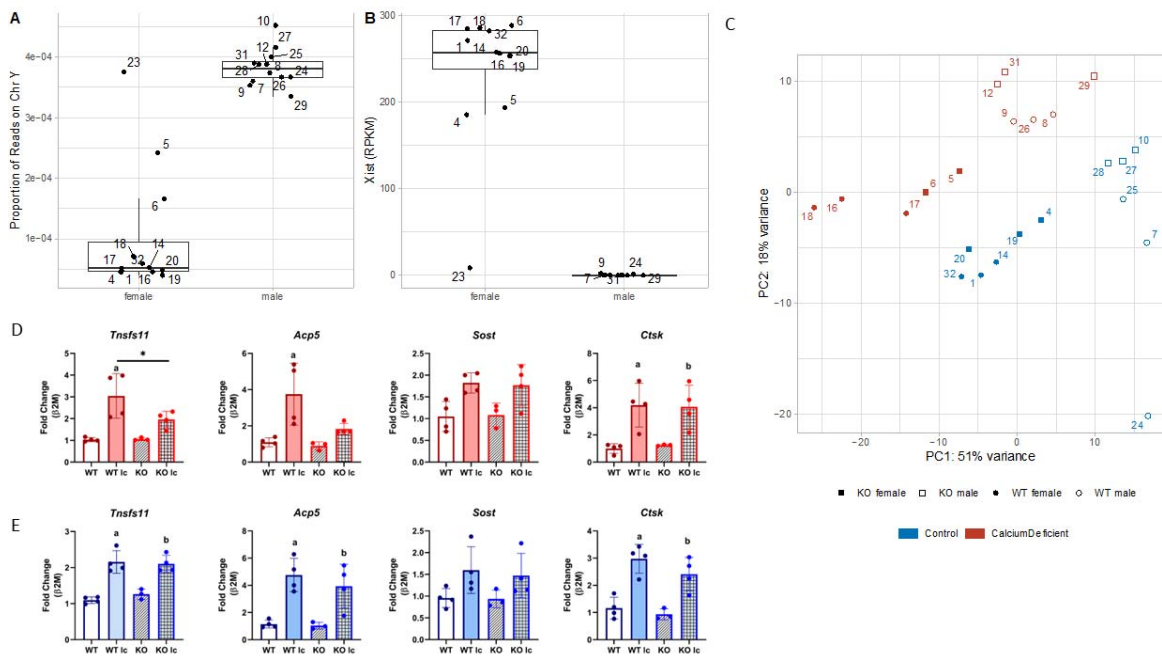

### Supplementary Figure 3: Quality control and validation of RNA sequencing

Sanity check of data on the sample's sex. **A:** Boxplot of proportional of reads on chromosome Y. Male should have a higher value than female. **B:** Boxplot of RPKM of *Xist*. Males should have very low expression of *Xist*.

**C:** Scatter plot of PC1 and PC2 from Principal Component Analysis (PCA) of gene expression data.

**D:** qPCR analysis of *Tnfsf11*, *Acp5*, *Sost*, and *Ctsk* genes from osteocyte-enriched bone chips from female samples. n= 3-4/sample. Two-way ANOVA was performed for statistical analysis. Gene fold-change was normalized using  $\beta$ -2-microglobulin as the housekeeping gene. a= Significantly different from WT, b= Significantly different from KO, \*= p < 0.05.

**E:** qPCR analysis of *Tnfsf11*, *Acp5*, *Sost*, and *Ctsk* genes from osteocyte-enriched bone chips from male samples. n= 3-4/sample. Two-way ANOVA was performed for statistical analysis. Gene fold-change was normalized using  $\beta$ -2-microglobulin as the housekeeping gene. a= Significantly different from WT, b= Significantly different from KO, \*= p < 0.05.

| Bone Parameters                           | Virgin        |               | Lactation                  |                             |
|-------------------------------------------|---------------|---------------|----------------------------|-----------------------------|
|                                           | WT            | KO            | WT                         | KO                          |
| <b>Femoral cortical bone parameters</b>   |               |               |                            |                             |
| Ct. B. Ar/T. Ar (%)                       | 47.4 ± 1.2    | 48 ± 1        | 35.2 ± 1.8 <sup>a</sup>    | 37.5 ± 1.8 <sup>b, c</sup>  |
| Ct. Th (mm)                               | 0.18 ± 0.004  | 0.19 ± 0.005  | 0.13 ± 0.004 <sup>a</sup>  | 0.14 ± 0.01 <sup>b, c</sup> |
| Ps. Pm (mm)                               | 5.16 ± 0.2    | 5.2 ± 0.06    | 5.18 ± 0.16                | 5.2 ± 0.14                  |
| Es. Pm (mm)                               | 3.95 ± 0.1    | 4 ± 0.13      | 4.4 ± 0.11 <sup>a</sup>    | 4.3 ± 0.09 <sup>b</sup>     |
| Marrow cavity area (mm <sup>2</sup> )     | 0.93 ± 0.1    | 0.93 ± 0.04   | 1.16 ± 0.05 <sup>a</sup>   | 1.13 ± 0.05 <sup>b</sup>    |
| <b>Femoral trabecular bone parameters</b> |               |               |                            |                             |
| BV/TV (%)                                 | 3.7 ± 1       | 4.5 ± 0.8     | 3.1 ± 0.7                  | 4 ± 1.1                     |
| Tb. Th (mm)                               | 0.043 ± 0.002 | 0.044 ± 0.001 | 0.039 ± 0.002 <sup>a</sup> | 0.039 ± 0.001 <sup>b</sup>  |
| Tb. Sp (mm)                               | 0.37 ± 0.05   | 0.36 ± 0.03   | 0.57 ± 0.15 <sup>a</sup>   | 0.44 ± 0.09                 |
| Tb. N (1/mm)                              | 0.85 ± 0.2    | 1.06 ± 0.2    | 0.8 ± 0.2                  | 1.04 ± 0.25                 |
| Bone parameters                           | Change        | % Change      |                            |                             |
|                                           |               | WT            | KO                         |                             |
| Cortical Bone Area Fraction               | Decrease      | 26%           | 22% *                      |                             |
| Cortical Thickness                        | Decrease      | 29%           | 24% *                      |                             |
| Ultimate Force                            | Decrease      | 38%           | 31% *                      |                             |
| Osteoclast Number/ bone parameter         | Increase      | 141%          | 129%                       |                             |
| TRAP-positive osteocytes                  | Increase      | 101%          | 175% *                     |                             |
| Lacunar Area                              | Increase      | 26%           | 15% *                      |                             |
| Serum RANKL                               | Increase      | 170%          | 80% *                      |                             |

1034 **Supplementary Table 1: FNDC5 KO mice femurs are partially resistant to lactation-induced bone loss.**

1035 Femoral cortical and trabecular bone parameters of WT and FNDC5 KO female virgin and lactation mice. n  
1036 = 5-8/group. Data presented as mean ± standard deviation. a= significant compared to WT control, b= significant  
1037 compared to KO control, c= significant compared to WT low Ca diet, 2-way ANOVA, significance <0.05, n= 8/group.

1038 Percentage change in different bone and serum parameters in WT and FNDC5 KO female mice with  
1039 lactation. \*= p<0.05 compared to WT.  
1040

| Bone Parameters                           | Female Normal Diet       |                 | Female Low Ca Diet           |                                | Male Normal Diet |                             | Male Low Ca Diet         |                              |
|-------------------------------------------|--------------------------|-----------------|------------------------------|--------------------------------|------------------|-----------------------------|--------------------------|------------------------------|
|                                           | WT                       | KO              | WT                           | KO                             | WT               | KO                          | WT                       | KO                           |
|                                           | <b>Ex vivo femur DXA</b> |                 |                              |                                |                  |                             |                          |                              |
| BMD (mg/cm <sup>2</sup> )                 | 75.4±<br>2.4             | 6.6± 1.5        | 65.4±<br>4.3 <sup>a</sup>    | 71.4±<br>3.4 <sup>c</sup>      | 74.6±<br>1.5     | 78.3±<br>3 <sup>a</sup>     | 68.2±<br>3               | 68.1±<br>2 <sup>b</sup>      |
| BMC (g)                                   | 0.03±<br>0.002           | 0.03±<br>0.001  | 0.024±<br>0.002 <sup>a</sup> | 0.027±<br>0.002 <sup>b,c</sup> | 0.029±<br>0.002  | 0.032±<br>0.004             | 0.026±<br>0.002          | 0.025±<br>0.003 <sup>b</sup> |
| <b>Femoral cortical bone parameters</b>   |                          |                 |                              |                                |                  |                             |                          |                              |
| Ct.                                       | 47.8±                    | 48.4±           | 41.6±                        | 45.2±                          | 40.1±            | 43.6±                       | 38.3±                    | 39.1±                        |
| B.Ar/T.Ar%                                | 1.6                      | 0.4             | 1.1 <sup>a</sup>             | 1.4 <sup>b,c</sup>             | 1.4              | 0.6 <sup>a</sup>            | 0.9                      | 1.2 <sup>b</sup>             |
| Ct. Th (mm)                               | 0.2±<br>0.01             | 0.2±<br>0.01    | 0.15±<br>0.01 <sup>a</sup>   | 0.17±<br>0.01 <sup>b,c</sup>   | 0.15±<br>0.01    | 0.2±<br>0.01 <sup>a</sup>   | 0.14±<br>0.01            | 0.14± 0.01 <sup>b</sup>      |
| Marrow Cavity Area                        | 0.92 ±<br>0.04           | 0.86±<br>0.02   | 1.02 ±<br>0.06 <sup>a</sup>  | 0.9 ±<br>0.02 <sup>c</sup>     | 1.1 ±<br>0.04    | 1.03 ±<br>0.06 <sup>a</sup> | 1.2 ±<br>0.03            | 1.08 ±<br>0.03 <sup>c</sup>  |
| <b>Femoral trabecular bone parameters</b> |                          |                 |                              |                                |                  |                             |                          |                              |
| BV/TV (%)                                 | 3.6 ±<br>1.2             | 4.3 ± 1         | 3.2 ± 1                      | 3.9 ± 1                        | 6.1 ±<br>1.1     | 8.7 ± 1.9                   | 5.3 ± 1.2                | 6.4 ± 0.6                    |
| Tb. Th (mm)                               | 0.059±<br>0.002          | 0.059±<br>0.004 | 0.056±<br>0.002              | 0.055±<br>0.001                | 0.036 ±<br>0.001 | 0.035 ±<br>0.001            | 0.035±0.<br>001          | 0.035 ±<br>0.002             |
| Tb. Sp (mm)                               | 0.38 ±<br>0.03           | 0.35 ±<br>0.02  | 0.51 ±<br>0.12 <sup>a</sup>  | 0.48 ±<br>0.08 <sup>b</sup>    | 0.274 ±<br>0.025 | 0.235 ±<br>0.021            | 0.278 ±<br>0.027         | 0.265 ±<br>0.01              |
| Tb. N (1/mm)                              | 0.81 ±<br>0.2            | 0.95 ±<br>0.14  | 0.7 ±<br>0.02                | 0.91<br>±0.13                  | 1.7 ±<br>0.34    | 2.5 <sup>a</sup> ±<br>0.5   | 1.5 ± 0.3                | 1.8 ± 0.1                    |
| <b>Femoral mechanical properties</b>      |                          |                 |                              |                                |                  |                             |                          |                              |
| Ultimate Force (N)                        | 19±<br>1                 | 19.4±<br>1.15   | 14.8±<br>0.7 <sup>a</sup>    | 16.4±<br>0.5 <sup>b</sup>      | 18.3±<br>1       | 17.6±<br>0.9                | 15±<br>1.3 <sup>a</sup>  | 12.7±<br>1.5 <sup>b,c</sup>  |
| Stiffness (N/mm)                          | 78.6±<br>3.2             | 79.1±<br>4.9    | 56.8±<br>5 <sup>a</sup>      | 67±<br>4.3                     | 76.7±<br>5.6     | 56.4±<br>4.75 <sup>a</sup>  | 56±<br>10.2 <sup>a</sup> | 48.5±<br>4.9 <sup>b,c</sup>  |
| Energy to Failure (N)                     | 2.9±<br>0.3              | 3.1±<br>0.6     | 1.8±<br>0.5 <sup>a</sup>     | 2±<br>0.3 <sup>b</sup>         | 3.6±<br>0.9      | 3.01±<br>0.6                | 2.5±<br>0.3 <sup>a</sup> | 2.35±<br>0.14                |

Supplementary Table 2: WT and FNDC5 KO female and male mice bone responds differently to a low-calcium diet

1041  
1042

1043 Femoral BMD, BMC, cortical and trabecular bone parameters, and mechanical properties of  
1044 4-5-month-old WT and KO female and male mice under a normal diet or a 2-week low calcium diet.  
1045 n = 5/group. Data presented as mean  $\pm$  standard deviation.  
1046 a= significant compared to WT control, b= significant compared to KO control, c= significant  
1047 compared to WT low Ca diet, 2-way ANOVA, significance <0.05, n= 4-5/group.  
048
